# Supplementary material for: A novel paramagnetic molecular superconductor formed by bis(ethylenedithio)tetrathiafulvalene, tris(oxalato)ferrate(iii) anions and bromobenzene as guest molecule: ET4[(H3O)Fe(C2O4)3]·C6H5Br
Source: Royal Society of Chemistry journal article supplement (doi:10.1039/b500107m), 2005-01-01
Supplement: b500107m.pdf [file b500107m.pdf]

### Supplementary Information

#### A novel paramagnetic molecular superconductor formed by bis(ethylenedithio)tetrathiafulvalene, tris(oxalato)ferrate(III) anions and bromobenzene as guest molecule: $\text{ET}_4[(\text{H}_3\text{O})\text{Fe}(\text{C}_2\text{O}_4)_3]\cdot\text{C}_6\text{H}_5\text{Br}$

Eugenio Coronado, Simona Curreli, Carlos Giménez-Saiz and Carlos J. Gómez-García

**Table 1S.** Crystal data and structure refinement for  $\text{ET}_4[(\text{H}_3\text{O})\text{Fe}(\text{C}_2\text{O}_4)_3]\cdot\text{C}_6\text{H}_5\text{Br}$  (**1**).

|                                   |                                             |                             |
|-----------------------------------|---------------------------------------------|-----------------------------|
| Empirical formula                 | C52 H40 Br Fe O13 S32                       |                             |
| Formula weight                    | 2034.52                                     |                             |
| Temperature                       | 292(2) K                                    |                             |
| Wavelength                        | 0.71073 Å                                   |                             |
| Crystal system                    | Monoclinic                                  |                             |
| Space group                       | C 2/c                                       |                             |
| Unit cell dimensions              | a = 10.2875(3) Å                            | $\alpha = 90^\circ$ .       |
|                                   | b = 20.0546(15) Å                           | $\beta = 93.238(5)^\circ$ . |
|                                   | c = 35.513(2) Å                             | $\gamma = 90^\circ$ .       |
| Volume                            | 7315.0(7) Å <sup>3</sup>                    |                             |
| Z                                 | 4                                           |                             |
| Density (calculated)              | 1.847 Mg/m <sup>3</sup>                     |                             |
| Absorption coefficient            | 1.726 mm <sup>-1</sup>                      |                             |
| F(000)                            | 4116                                        |                             |
| Crystal size                      | 0.40 x 0.20 x 0.15 mm <sup>3</sup>          |                             |
| Theta range for data collection   | 2.03 to 27.48°.                             |                             |
| Index ranges                      | -13 ≤ h ≤ 13, -26 ≤ k ≤ 26, -46 ≤ l ≤ 45    |                             |
| Reflections collected             | 38333                                       |                             |
| Independent reflections           | 8228 [R(int) = 0.0741]                      |                             |
| Completeness to theta = 27.48°    | 97.9 %                                      |                             |
| Absorption correction             | Semi-empirical from equivalents             |                             |
| Max. and min. transmission        | 0.774 and 0.672                             |                             |
| Refinement method                 | Full-matrix least-squares on F <sup>2</sup> |                             |
| Data / restraints / parameters    | 8228 / 0 / 487                              |                             |
| Goodness-of-fit on F <sup>2</sup> | 1.060                                       |                             |
| Final R indices [I > 2σ(I)]       | R1 = 0.0487, wR2 = 0.1089                   |                             |
| R indices (all data)              | R1 = 0.1086, wR2 = 0.1333                   |                             |
| Largest diff. peak and hole       | 0.746 and -0.931 e.Å <sup>-3</sup>          |                             |

**Table 2S.** Intermolecular S...S distances shorter than 3.60 Å (the sum of the van der Waals radii).

| ET molecules | Distances                                 |
|--------------|-------------------------------------------|
| A-B          | S(2)-S(13) 3.3739(16)                     |
|              | S(5)-S(15) <sup>i</sup> 3.5926(16) (×2)   |
|              | S(6)-S(13) 3.3265(14)                     |
|              | S(8)-S(11) 3.5392(16)                     |
|              | S(8)-S(15) 3.5810(16)                     |
| B-B          | S(10)-S(16) <sup>ii</sup> 3.5131(15)      |
|              | S(16)-S(14) <sup>ii</sup> 3.4391(14) (×2) |

Symmetry codes: (i)  $-x+1/2, -y+1/2, -z$ ;  
 (ii)  $-x+2, -y, -z$ .

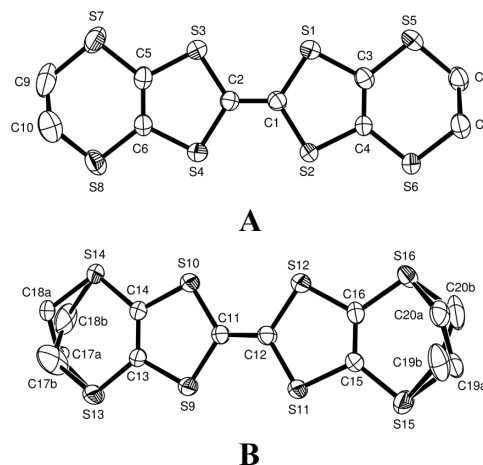

**Figure 1S.** Molecular geometry and labelling of the two independent ET molecules (A and B) in **1**.

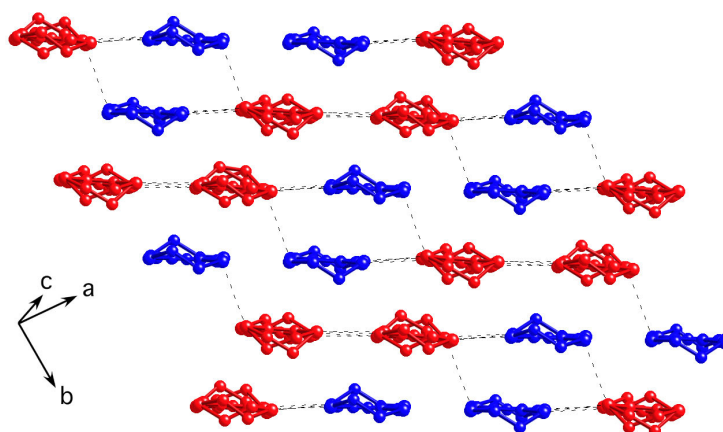

**Figure 2S.** View of the organic layer of **1** showing the  $\beta''$  type of packing and the intermolecular S...S contacts shorter than 3.60 Å (the distances are listed in Table 1S). Molecules depicted in red have their ethylene groups disordered (B type molecule in Fig. 1S). Molecules depicted in blue have their ethylene groups ordered (A-type molecule in Fig. 1S).

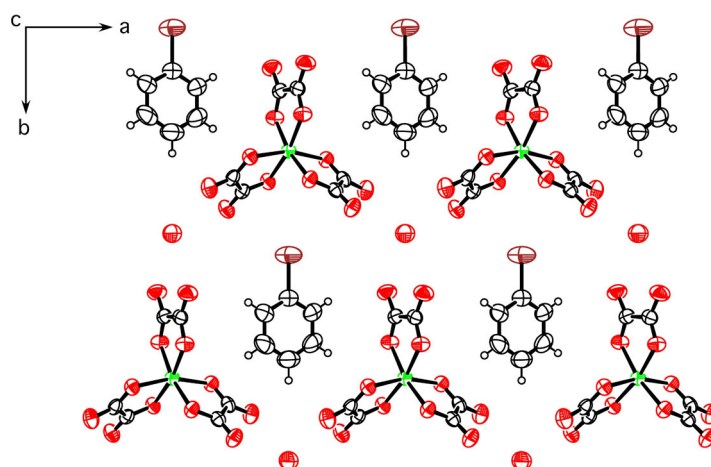

**Figure 3S.** View of the anion and solvent layer in **1** showing the bromobenzene molecules located in the pseudohexagonal cavity formed by the tris(oxalato)ferrate(III) anions and  $\text{H}_3\text{O}^+$  cations.
